# 1 **Diet Potentially Drives the Differentiation of Eating Behaviours via**

## 2 **Alterations to the Gut Microbiome in Infants**

3 Cathy Yan <sup>1</sup>, Helen Zhao <sup>1</sup>, Navika Nayar <sup>1</sup>, Kyung E. Rhee <sup>2</sup>, Julie C. Lumeng <sup>3</sup>

4 <sup>1</sup>Department of Microbiology and Immunology, University of British Columbia, Vancouver,  
5 Canada

6 <sup>2</sup>Department of Pediatrics, UC San Diego School of Medicine, La Jolla, California

7 <sup>3</sup>Department of Pediatrics, University of Michigan Medical School, and Department of  
8 Nutritional Sciences, University of Michigan School of Public Health, Ann Arbor, Michigan.

9

### 10 **ABSTRACT**

11 Certain infant eating behaviours are associated with adverse health outcomes such as  
12 obesity. While a diet consisting of infant formula has been linked to higher-risk eating  
13 behaviours and changes in the gut microbiome, little is known about what role the gut  
14 microbiome plays in mediating eating behaviours. Using 16S rRNA sequences extracted from 96  
15 fecal samples collected from 58 infants, we identified a subset of bacterial taxa that were more  
16 abundant in formula-fed infants, primarily composed of the phylum Firmicutes. The presence of  
17 these taxa correlated with a lower drive to eat (i.e., lower food responsiveness). Furthermore,  
18 short-chain fatty acid production pathways were significantly more abundant in formula-fed  
19 infants, negatively correlated with food responsiveness, and positively associated with relative  
20 abundance of the Firmicutes subset. Our results suggest that higher abundances of Firmicutes in  
21 formula-fed infants may decrease their food responsiveness through short-chain fatty acid  
22 production in the first four months of life. Taken together, these findings suggest a potential role

23 for the infant's diet in impacting eating behaviour via changes to the gut microbiome, which may  
24 lead to the development of novel interventions for the prevention of childhood obesity.

25

## 26 **INTRODUCTION**

27 The human gut microbiome comprises trillions of different bacteria that interact to  
28 influence an individual's physiology and mental health via immunologic, endocrine, and neural  
29 pathways (1). It can protect an individual by barricading pathogenic organisms from colonizing  
30 the body, aids in metabolism through processes that promote the breakdown of toxins or vitamin  
31 synthesis, and serves a trophic role by maintaining tolerance to antigens in food (1). For infants,  
32 their gut microbiota is similarly crucial for health and development, and is impacted by factors  
33 such as mode of delivery, exposure to antibiotics or probiotics, and diet (2).

34 Regarding diet specifically, previous literature has suggested that breastfeeding shapes  
35 the gut microbiota in neonates through direct introduction of the mother's milk microbiota and  
36 prebiotics such as human milk oligosaccharides (HMO) (3). The consensus is that breastfed  
37 infants have gut microbiota with lower diversity and lower levels of the phylum Firmicutes  
38 compared to formula-fed infants (1, 4). Despite the impact of infants' diet on specific taxa in  
39 their gut microbiota being explored, research regarding the effects of breastfeeding or formula-  
40 feeding on inter-microbial communities is lacking. As bacteria exist in complex networks rather  
41 than independently, this level of understanding is critical.

42 Additionally, breastfeeding may be associated with lower rates of childhood obesity  
43 through the theorized mechanisms of developing healthier food preferences and eating  
44 behaviours (5, 6). In infants, eating behaviours can be evaluated through the Baby Eating  
45 Behaviour Questionnaire, which measures several different eating behavior profiles: food

46 responsiveness - the extent to which a child indicates an interest in and desires to spend time  
47 eating food; enjoyment of food - the extent to which a child finds eating pleasurable and desires  
48 to eat; satiety responsiveness - the extent to which a child becomes full easily and leaves food  
49 when finished eating; slowness of eating - the pace at which the child consumes their food; and  
50 general appetite, which correlates with the other metrics (7, 8).

51 An growing body of research indicates that an adult's gut microbial profile may play a  
52 key role in their eating behaviours (9). A recent clinical study conducted by Sanmiguel et al.  
53 showed that interventions shaping the microbiomes of obese patients led to a reduction in their  
54 cravings (9). Other studies have shown that taking probiotic supplements decreases food intake  
55 in mice (10), and leads to weight loss in humans (11, 12). This may be because gastrointestinal  
56 microbes are incentivized to manipulate their hosts' eating behaviour in order to minimize  
57 selective pressures, either by inducing intake of foods that "suppress their competitors", or that  
58 "enhance their own fitness" (13). Furthermore, although previous studies support the gut-brain  
59 axis model where nervous stimulation by gut bacterial peptides results in activating the vagus  
60 nerve to regulate eating behaviours and body weight (14, 15), there remains a lack of research on  
61 how bacterial populations are associated with eating behaviours in infants.

62 In this study, we explored relationships between the infant's diet, gut microbiome, and  
63 eating behaviours using the "eating behaviour development in infants" data repository by Rhee et  
64 al. Our aim was to examine how different diets influence the diversity and community  
65 composition of infants' gut microbiomes, and explore how these microbiomes may relate to  
66 infant eating behaviors. Overall, we seek to propose a possible pathway for how the gut  
67 microbiota may influence eating behaviours, which could have implications for infants' health.  
68 We hypothesize that the infant's diet influences their gut microbial profiles, which, in turn,

69 affects their eating behaviours. More precisely, we predict that formula-feeding is associated  
70 with a higher abundance of the phylum Firmicutes and the exhibition of obesity-prone eating  
71 behaviours.

72

## 73 **METHODS**

### 74 **Participant Recruitment**

75 Infant-mother dyads were recruited from the community. Mothers provided written  
76 informed consent for themselves and their infants. The University of Michigan Institutional  
77 Review Board approved this study. Inclusion criteria were: (1) Child was born at 37.0 – 42.0  
78 weeks gestation, with weight appropriate for gestational age, and no significant perinatal or  
79 neonatal complications. Exclusions were: (1) non-fluency in English in the parent; (2) foster  
80 child; (3) mother < 18 years old; (4) medical problems or known diagnosis affecting current or  
81 future eating, growth or development; (5) child protective services involvement in the neonatal  
82 period; (6) infant does not consume at least 2 ounces in one feeding from an artificial nipple and  
83 bottle at least once per week. The exclusion of infants who had not yet taken a feeding from an  
84 artificial nipple resulted in the exclusion of few infants, as most infants in the population from  
85 which this cohort was recruited had fed from a bottle with an artificial nipple at least  
86 occasionally by the age of recruitment.

### 87 **Data Collection**

88 At each age point, mothers completed the Baby Eating Behavior Questionnaire, an  
89 adapted version of the Children's Eating Behaviour Questionnaire. The BEBQ is an 18-item  
90 parent-report psychometric measure of infant appetite. All questions in each subscale were  
91 scored on a 5-point Likert scale as never (1), rarely (2), sometimes (3), often (4), or always (5),

92 and mean scores for each subscale were then calculated (range: 1–5). It generates 4 subscales (an  
93 example of a question is provided in brackets): Enjoyment of food (4 items; “My baby seemed  
94 contented while feeding”), Food responsiveness (6 items; Even when my baby had just eaten  
95 well s/he was happy to feed again if offered”), Slowness in eating (4 items; “My baby took more  
96 than 30 minutes to finish feeding”), Satiety responsiveness (3 items; “My baby got full before  
97 taking all the milk I thought s/he should have”), and General appetite (1 item). Internal reliability  
98 of the subscales by age based on Cronbach’s alpha were: Enjoyment of food (2 weeks: 0.62, 2  
99 months: 0.61, 4 months: 0.70), Food responsiveness (2 weeks: 0.75, 2 months: 0.75, 4 months:  
100 0.78), Slowness in eating (2 weeks: 0.63, 2 months: 0.62, 4 months: 0.57), Satiety responsiveness  
101 (2 weeks: 0.14, 2 months: 0.42, 4 months: 0.44). Given the poor internal reliability of the Satiety  
102 Responsiveness subscale in this sample, analyses of this subscale were omitted.

103 To assess infant dietary intake, we used selected questions from age-appropriate  
104 questionnaires developed by the U.S. Center for Disease Control (CDC); at each age point,  
105 mothers reported, in the last 7 days, the number of feedings per day of formula or breastmilk.  
106 From these data, infants were classified as exclusively breastfed, exclusively formula fed, or  
107 mixed. Only infants from the first two groups were included in subsequent analyses. At each age  
108 point, the mother reported, from a list of possible signs and symptoms (e.g., diarrhea, fever,  
109 vomiting), whether the infant had any health issues in the preceding two weeks. Mothers also  
110 reported whether they or their infant had taken any probiotics or antibiotics in the last two weeks.  
111 Mothers reported mode of delivery (Caesarean versus vaginal).

112 Fecal samples were collected from mothers and infants at each age point. Fecal samples  
113 from the initial cohort were collected using BD Swube™ dual headed. DNA was extracted and  
114 the 16S rRNA region was sequenced on an Illumina MiSeq platform using the 515F/806R primer

115 set. Sequencing data was deposited in the European Nucleotide Archive (ENA) at EMBL-EBI  
116 under the accession number PRJEB39437 by the University of California San Diego Microbiome  
117 Initiative, with all other data recorded in the metadata.

## 118 **Identification of Confounding Variables**

119 Potential factors that could influence the infant gut microbiome independent of diet were  
120 assessed based on prior knowledge and included maternal and infant intake of probiotics and/or  
121 antibiotics in the 2 weeks prior to sample collection, and mode of delivery (vaginal vs  
122 Caesarean-section). Associations between these factors, and diet and eating behaviours were  
123 evaluated using Fisher's test and Mann-Whitney U test. Their impact on the gut microbiome was  
124 assessed based on weighted UniFrac distance and permutational analysis of variance  
125 (PERMANOVA) using the vegan package (16).

## 126 **Microbiome Sequences Analysis**

127 Unless stated otherwise, the following analyses were performed using QIIME2  
128 (v2020.11) and its plugins (17). Exact commands can be found in the supplementary command  
129 line script. After demultiplexing, 16S rRNA sequences underwent quality control using DADA2  
130 (18). Next, a phylogenetic tree was generated and used to plot an alpha-rarefaction curve to  
131 identify the sampling depth at which richness has been fully observed. Taxonomy was assigned  
132 using the Greengenes 99% OTU database (19).

## 133 **Alpha and Beta Diversity Calculations**

134 Metadata, along with the phylogenetic tree and taxonomy-annotated feature table  
135 exported from QIIME2, were imported into R. *Ape* (20) was used to convert QIIME2's  
136 multichotomous tree into a dichotomous one for downstream analyses. *Phyloseq* (21) and *btools*  
137 were used to calculate alpha and beta diversity metrics for comparing breastfed and formula-fed

138 infants. *Phyloseq* was used to calculate observed OTUs, Chao1, ACE, Shannon, Simpson,  
139 Inverse Simpson, and Fisher alpha diversity metrics, and Bray-Curtis, Jaccard, weighted  
140 UniFrac, and unweighted UniFrac distances for beta diversity. *Btools* was used to calculate  
141 Faith's phylogenetic diversity. Statistical significance was evaluated using the Mann-Whitney U  
142 test for alpha diversity and PERMANOVA for beta diversity.

### 143 **Random Forest Classifier**

144 Using *caret* (22) and *randomForest* (23), a random forest classifier was optimized,  
145 trained, and used to predict diet based on genus-level relative abundance. Receiver operating  
146 characteristic curves and feature importance were also calculated using these two packages.

### 147 **Co-abundant Clusters Identification**

148 Microbial co-abundance at the genus level was calculated for genera that were present in  
149 at least twenty percent of the infants. Spearman correlation distance and Ward's linkage were  
150 calculated for the centre log ratio-transformed relative abundance values and used to cluster  
151 microbes, as previously described by Cirstea et. al (24). The Mann-Whitney U test was used to  
152 compare relative cluster abundance between breastfed and formula-fed infants. Spearman  
153 correlation was calculated to assess the correlation between cluster relative abundance and eating  
154 behaviours.

### 155 **Metabolic Pathways Analysis**

156 Inferred functional microbiota profiling was done using PICRUSt2 (v2.3.0b) (25).  
157 Differences in the relative abundance of metabolic pathways present in at least five percent of  
158 the infants were assessed using *ALDeX2* (26). Pathways were deemed to be statistically  
159 significantly differentially present when the Benjamini-Hochberg corrected P values for Welch's  
160 t-test and the Wilcoxon test were both less than 0.05.

161

## 162 **RESULTS AND DISCUSSION**

### 163 **Participant Characteristics**

164 This study uses data collected from 58 infants at ages 2 weeks, 2 months, and 4 months  
165 for a total of 96 samples. These infants were exclusively breastfed or formula-fed in at least the 7  
166 days leading up to data collection, and had no vomiting, diarrhea, or fever. Sample  
167 characteristics are shown in Table 1. Because the sample size did not provide sufficient power  
168 for a linear mixed effects (LME) model with infant ID as a random effect and age as a nested  
169 random effect, all samples were treated as independent even if they came from the same infant at  
170 different timepoints. Some infants provided only one sample, making a random-slope and  
171 random-intercept LME model infeasible. An LME model with only infant ID as the random  
172 effect indicated no significant associations between the gut microbiome and eating behaviours.

173

174 **Table 1.** Sample Characteristics (n = 58). BEBQ scores are on a scale of 1 to 5, with higher  
175 scores indicating greater demonstration of the behaviour.

|                                                | <b>Breastfed</b> | <b>Formula-fed</b> |
|------------------------------------------------|------------------|--------------------|
| <b>Age 2 weeks (n = 29)</b>                    |                  |                    |
| Number of Infants                              | 28               | 1                  |
| <b>BEBQ Scores (mean (standard deviation))</b> |                  |                    |
| General Appetite                               | 4.08 (0.91)      | 5.00               |
| Slowness in Eating                             | 2.72 (0.79)      | 1.25               |
| Food Responsiveness                            | 2.48 (0.68)      | 1.00               |
| Enjoyment of Food                              | 4.54 (0.41)      | 5.00               |



|                                                |             |             |
|------------------------------------------------|-------------|-------------|
| <b>Age 2 months (n = 41)</b>                   |             |             |
| Number of Infants                              | 34          | 7           |
| <b>BEBQ Scores (mean (standard deviation))</b> |             |             |
| General Appetite                               | 4.07 (0.69) | 3.43 (1.40) |
| Slowness in Eating                             | 2.56 (0.69) | 2.18 (0.59) |
| Food Responsiveness                            | 2.08 (0.53) | 1.92 (0.54) |
| Enjoyment of Food                              | 4.35 (0.50) | 4.68 (0.37) |
| <b>Age 4 months (n = 26)</b>                   |             |             |
| Number of Infants                              | 20          | 6           |
| <b>BEBQ Scores (mean (standard deviation))</b> |             |             |
| General Appetite                               | 3.67 (0.91) | 3.83 (0.75) |
| Slowness in Eating                             | 2.53 (0.66) | 2.00 (0.52) |
| Food Responsiveness                            | 1.94 (0.62) | 1.75 (0.67) |
| Enjoyment of Food                              | 4.29 (0.57) | 4.58 (0.34) |

176

177 **No confounding variables were identified.**

178 In addition to diet, our main variable of interest, the mode of delivery (19), antibiotic use

179 (20), and probiotic use (21) have been reported to impact the infant gut microbiome.

180 Consequently, we assessed the effect of each factor within our study cohort. As the PCoA plot

181 for weighted UniFrac distance accounted for the most variance compared to those based on

182 Jaccard, Bray-Curtis, and unweighted UniFrac distances (Fig. 1a, Supplementary Fig. 1), we

183 used weighted UniFrac as our metric for evaluating the impact of confounders on the gut

184 microbiome. Additionally, we also ensured that no other confounding variable was associated

185 with the infant's diet. We found that infant gut microbiomes did not cluster differently based on  
186 weighted UniFrac distance by probiotic usage (PERMANOVA:  $F_{95} = 0.55$ ,  $P = 0.67$ ,  $R^2 =$   
187  $0.0059$ ), antibiotic usage (PERMANOVA:  $F_{95} = 1.41$ ,  $P = 0.22$ ,  $R^2 = 0.015$ ), or mode of delivery  
188 (PERMANOVA:  $F_{95} = 1.67$ ,  $P = 0.122$ ,  $R^2 = 0.035$ ).

189

190 **Breastfed and formula-fed infants host distinct microbiomes.**

191

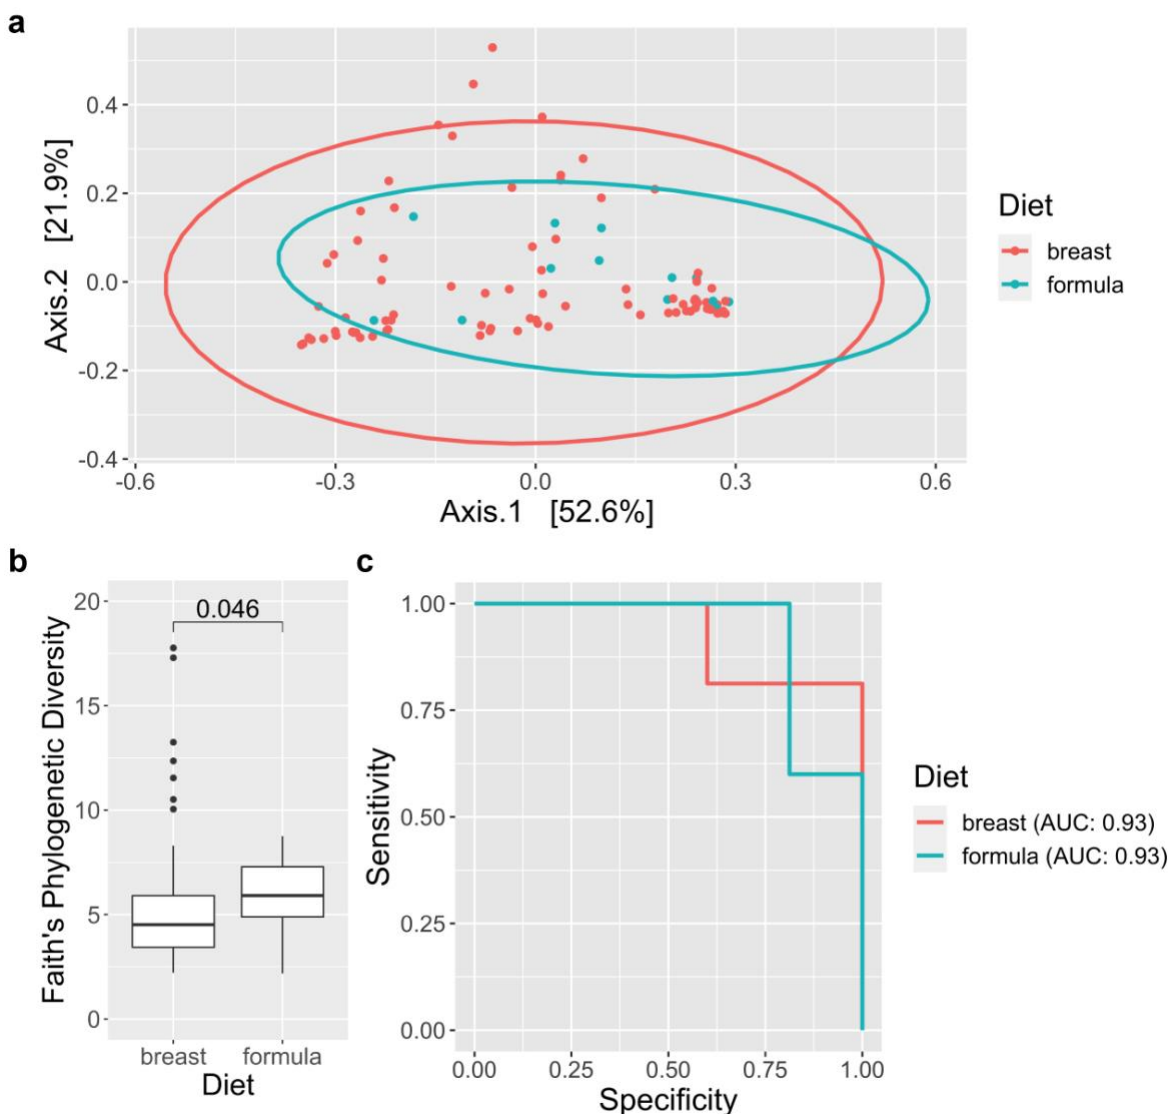

192

193 **FIG. 1 Breastfed and formula-fed infants host distinct microbiomes.** (A) Weighted UniFrac

194 beta diversity PCoA plot for infant samples, coloured by diet (breastfed or formula-fed).

195 Statistical significance was assessed using PERMANOVA ( $F_{95} = 3.69$ ,  $P = 0.02$ ,  $R^2 = 0.038$ ). (B)

196 Comparison of Faith's phylogenetic diversity between diet. Whiskers represent 1.5 times the

197 interquartile range; points beyond them represent outliers. Statistical significance was assessed

198 using the Mann-Whitney U test. (C) Receiver operating characteristic (ROC) curve for

199 evaluating the performance of a random forest classifier trained to separate breastfed and  
200 formula-fed infants.

201  
202 We compared alpha and beta diversity metrics for breastfed and formula-fed infants,  
203 expecting the two groups to host distinct microbial communities and for breastfed infants to have  
204 lower alpha diversity (27). For these analyses, we started by determining the sampling depth at  
205 which an increase in depth led to no change in alpha diversity. Based on the alpha-rarefaction  
206 curve (Supplementary Fig. 2a) and reads frequency histogram (Supplementary Fig. 2c) generated  
207 using QIIME2, the sampling depth was set at 14,000 reads. This sampling depth led to 17 infants  
208 being excluded from diversity analyses.

209 Next, weighted UniFrac was again used as the beta diversity metric for how infants  
210 clustered based on diet (Fig. 1a). Although our PCoA displayed no obvious visible clustering, the  
211 gut microbiomes of breastfed and formula-fed infants were significantly different  
212 (PERMANOVA:  $F_{95} = 3.69$ ,  $P = 0.02$ ,  $R^2 = 0.038$ ). For alpha-diversity, formula-fed infants had  
213 higher levels of alpha diversity than breastfed infants across most metrics (Observed:  $P < 0.001$ ,  
214 Chao1:  $P = 0.0011$ , ACE:  $P = 0.001$ , Shannon:  $P = 0.012$ , Simpson:  $P = 0.1$ , Inverse Simpson:  $P$   
215  $= 0.1$ , Fisher:  $P < 0.001$ ); Supplementary Fig. 3). Breastfed infants also had significantly lower  
216 Faith's phylogenetic diversity than formula-fed infants ( $P = 0.046$ ; Fig. 1b).

217 The fact that breastfed and formula-fed infants differed in terms of weighted UniFrac and  
218 multiple alpha diversity metrics suggests differences in taxonomic composition between the two  
219 diets. However, instead of merely identifying differentially abundant taxa, we attempted to  
220 distinguish between breastfed and formula-fed infants based on relative abundance at the genus  
221 level using a random forest classifier. This strategy has been used previously to successfully

222 separate healthy dogs from those with irritable bowel syndrome (28). With our model, we  
223 achieved an area under the curve (AUC) of 0.87 (Figure 1c). These data demonstrate that  
224 breastfed and formula-fed infants' gut microbiomes are distinct in genus-level composition,  
225 particularly for a phylum reported to be more abundant in formula-fed infants (29).

226

227 **Two communities of bacteria are differentially abundant between breastfed and formula-**  
228 **fed infants.**

229

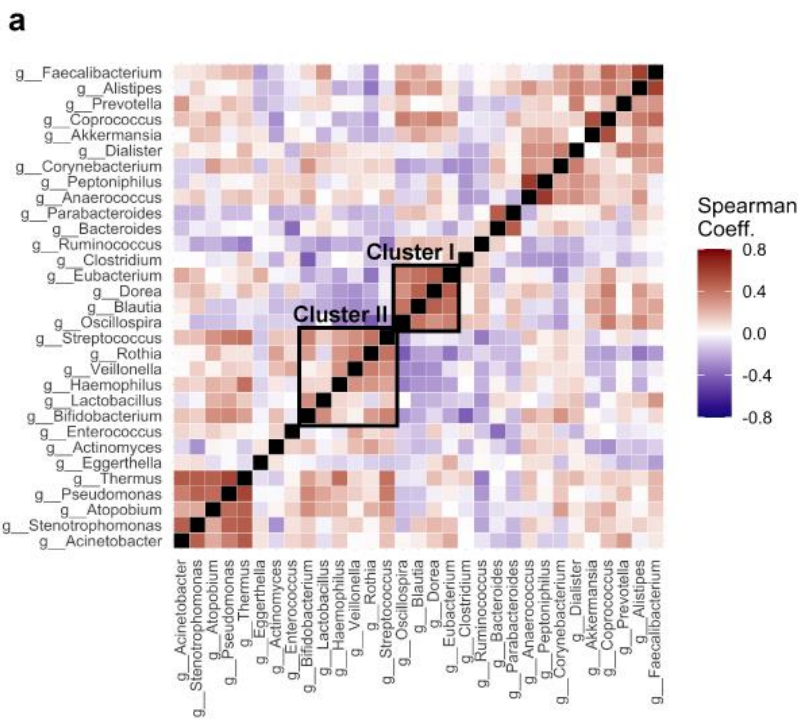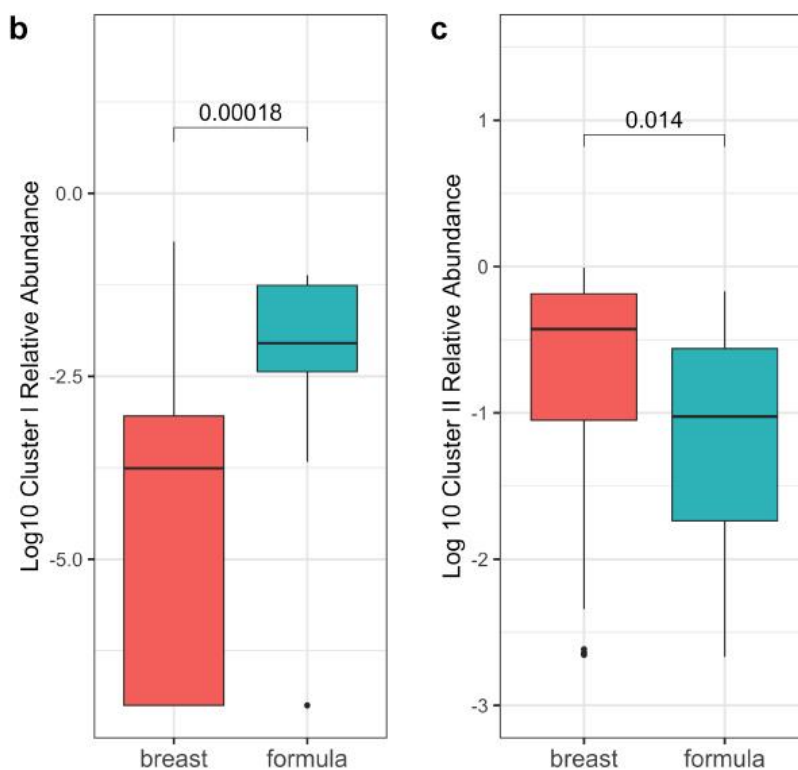

230

231 **FIG. 2 Breastfed and formula-fed infants host two microbial communities that are**

232 **differentially abundant. (A) Heatmap based on the covariance of bacterial genera coloured by**

233 Spearman correlation coefficient. Axes are arranged based on Spearman correlation distance and  
234 Ward linkage. (B, C) Two covariant bacterial clusters are differentially abundant between  
235 breastfed and formula-fed infants based on the Mann-Whitney U test.

236  
237 Since most of the genera that best distinguish between infants with different diets  
238 belonged to the phylum Firmicutes, we tested if those genera are related functionally. Within the  
239 gut, microbes are part of networks that cooperate and compete (30). We inferred the presence  
240 and composition of these types of communities based on genus-level coabundance. Spearman's  
241 correlations between genera present in at least twenty percent of the infants were calculated and  
242 used for clustering into a dendrogram. Covariance was then visualized using a heatmap, and  
243 three clusters of high covariance composed of at least three genera were identified  
244 (Supplementary Figure 4a). Out of these, only two were found to be differentially abundant  
245 between breastfed and formula-fed infants (Supplementary Figure 4b; Figure 2a).

246 The first, Cluster I, is composed of the genera *Dorea*, *Eubacterium*, *Blautia*, and  
247 *Oscillospira*, and is significantly more abundant in formula-fed infants ( $P < 0.001$ ; Figure 2b).  
248 This is in concordance with previous studies reporting decreases in levels of the phylum  
249 Firmicutes and order Clostridiales in breastfed infants (31). *Blautia* regulates G-protein coupled  
250 receptors through butyric and acetic acid production, decreasing obesity and visceral fat  
251 accumulation (32). *Oscillospira* is also associated with leanness as it degrades animal-derived  
252 glycans from the host (33). *Eubacterium* is a prolific butyrate producer, breaking down complex  
253 carbohydrates from dietary fibers (34).

254 Cluster II, composed of the genera *Bifidobacterium*, *Lactobacillus*, *Haemophilus*, *Rothia*,  
255 *Streptococcus*, and *Veillonella*, is significantly more abundant in breastfed infants ( $P = 0.014$ ;

256 Figure 2c). *Bifidobacterium* is well-known to dominate the microbiota of breastfed infants, with  
 257 some studies reporting as much as double the relative abundance in breastfed infants compared  
 258 to formula-fed infants (35). The same study also noted higher levels of *Lactobacillus* and  
 259 *Streptococcus*. *Bifidobacterium* and *Lactobacillus* digest dietary fibers and produce acetate (36),  
 260 while *Streptococcus* and *Veillonella* induce cytokine production to modulate the gut immune  
 261 system (37). *Rothia* degrades gluten (38). Additionally, research has shown that genera in Cluster  
 262 II make up a large proportion of the breast milk microbiota (39).

263

264 **Diet is a driver of the relationships between food responsiveness and relative cluster**  
 265 **abundance.**

266

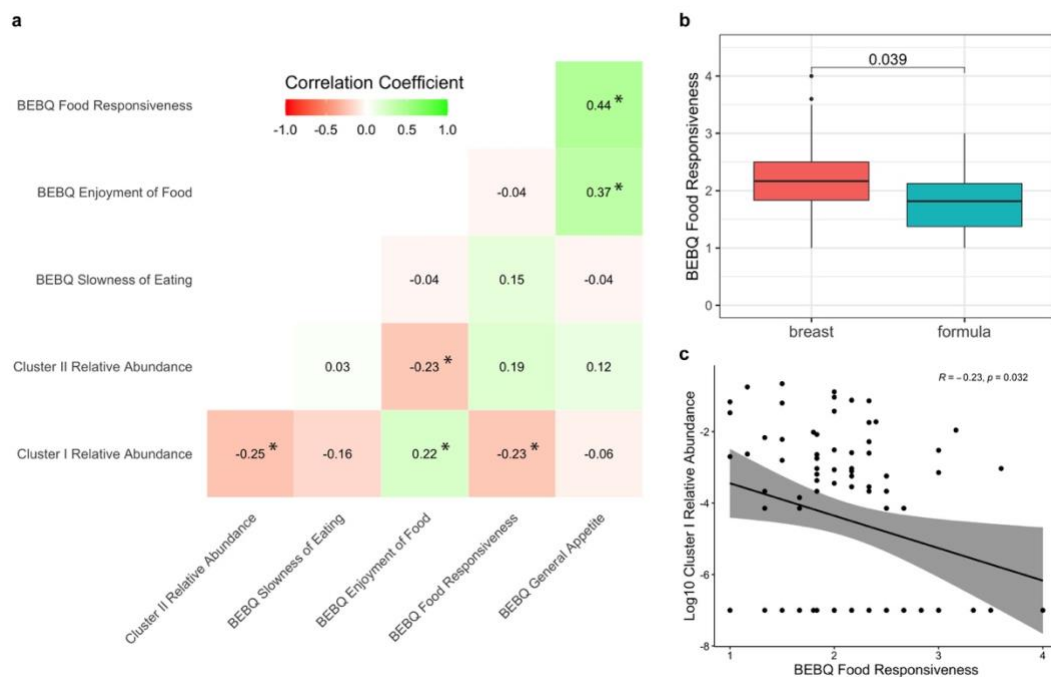

267

268

269 **FIG. 3 Diet is a driver of the relationships between food responsiveness and relative cluster**  
 270 **abundance.** (A) Heatmap of correlation matrix between cluster abundance and BEBQ behaviour



271 metrics coloured by Spearman correlation coefficient. Significance ( $p < 0.05$ ) is marked with a  
272 star (\*). (B, C) Spearman correlation coefficient and significance for cluster I and food  
273 responsiveness for breastfed and formula-fed infants combined and separately.

274  
275 The composition of the gut microbiome has been found to impact eating behaviours, but  
276 most research has involved adult rather than infant cohorts, and focused on individual taxa rather  
277 than microbial communities (13). Therefore, we sought to uncover relationships between the two  
278 identified clusters and eating behaviours assessed using the BEBQ. Spearman correlations were  
279 calculated between the relative abundances of Clusters I and II, and the five eating behaviours,  
280 and then visualized with a heatmap. Cluster I relative abundance was significantly correlated  
281 with food responsiveness ( $R = -0.23$ ,  $P = 0.03$ ; Figure 3c), and both clusters were significantly  
282 correlated with enjoyment of food (Cluster I:  $R = 0.22$ ,  $P = 0.04$ ; Cluster II:  $R = -0.23$ ,  $P = 0.03$ ;  
283 Figure 3a, Supplementary Figure 5). Food responsiveness is significantly higher in breastfed  
284 infants compared to formula-fed infants ( $P = 0.039$ , Figure 3b), aligning with literature (6).  
285 These findings lead us to postulate that Cluster I relative abundance, which is regulated by diet,  
286 is inversely associated with food responsiveness.

287  
288 **Fermentation of succinate to butanoate is significantly negatively correlated with food**  
289 **responsiveness.**

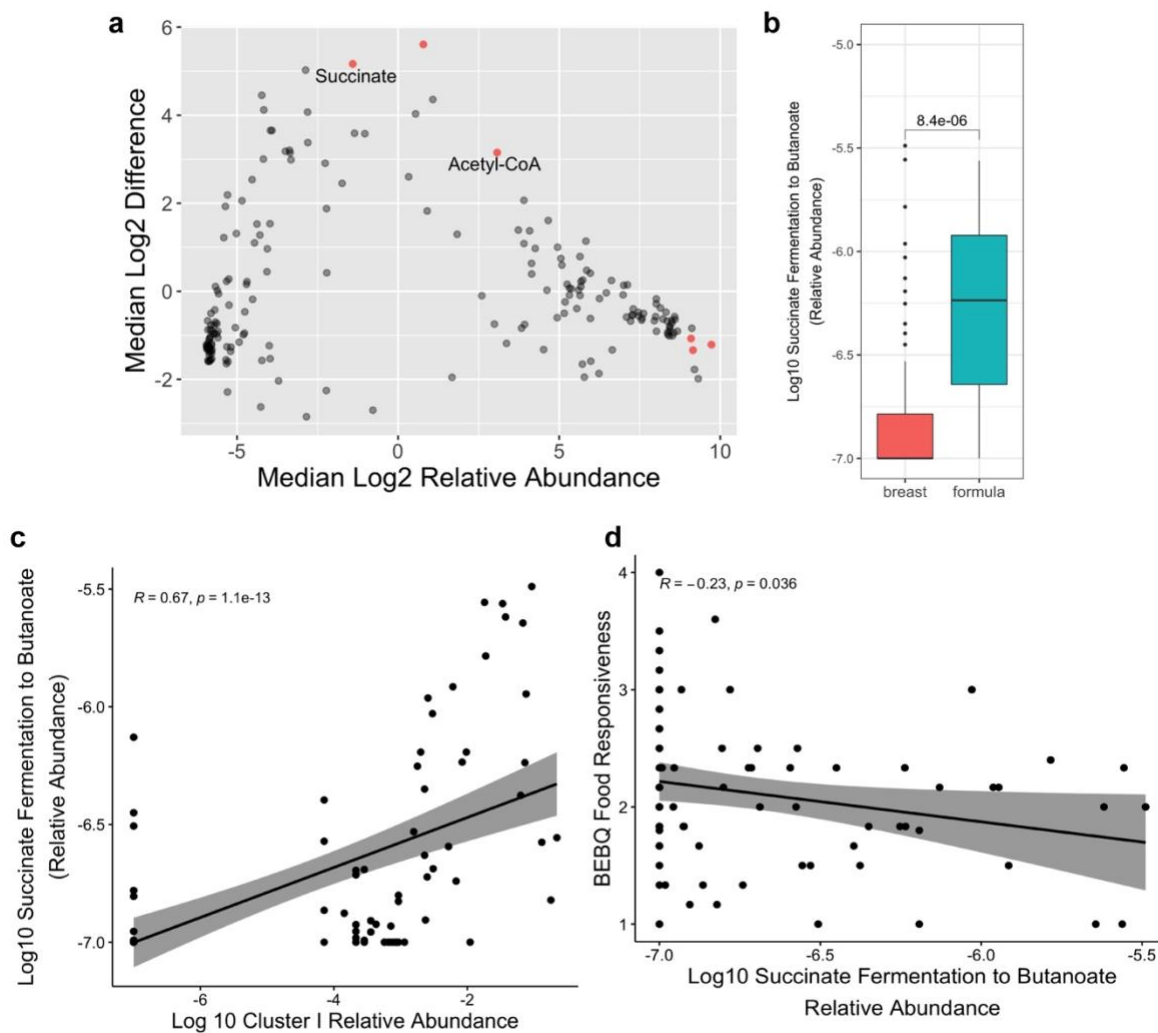

290

291

292 **FIG. 4 Fermentation of succinate to butanoate is significantly negatively correlated with**

293 **food responsiveness.** (A) Metabolic pathways within breastfed and formula-fed infants inferred

294 using PICRUSt2. Differentially abundant pathways ( $p < 0.05$  for Benjamini-Hochberg corrected

295 P values for Welch's t-test and Wilcoxon test) are coloured in red. Two differentially abundant

296 pathways relevant to SCFA synthesis (acetyl-CoA fermentation to butanoate II, and succinate

297 fermentation to butanoate) are labelled. (B) Succinate fermentation to butanoate is significantly

298 more highly expressed in formula-fed infants according to the Mann-Whitney U test. (C, D)

299 Succinate fermentation to butanoate is significantly positively correlated with cluster I  
300 abundance and negatively correlated with food responsiveness based on Spearman correlation  
301 coefficient and p-values.

302  
303 Finally, we sought to identify metabolic pathways that link Cluster I with food  
304 responsiveness. Using ALDeX2 to analyse metabolic pathways inferred by PICRUS2, six  
305 pathways were found to be significantly differentially expressed between breastfed and formula-  
306 fed infants (Supplementary Table 2, Figure 4a). Two involve fermentation to short-chain fatty  
307 acids (SCFAs): acetyl-CoA fermentation to butanoate II and succinate fermentation to butanoate.  
308 SCFAs are important in the context of gut microbiota and eating behaviours because they  
309 regulate food intake and are associated with alterations in body weight (40). Both are  
310 significantly more abundant in formula-fed infants than breastfed infants ( $P < 0.001$  for all three;  
311 Supplementary Figure 6a, Figure 4b).

312 While the relative abundances of both are significantly positively correlated with Cluster  
313 I relative abundance ( $R = 0.54$  and  $0.67$ , respectively and  $P < 0.001$  for both), none are  
314 significantly correlated with Cluster II relative abundance ( $R = -0.19$  and  $-0.08$  and  $P = 0.07$  and  
315  $0.41$ , respectively; Supplementary Figure 6b, Figure 4c). These data align with how the phylum  
316 Firmicutes is commonly responsible for SCFA production (41). Only one, succinate fermentation  
317 to butanoate, is significantly negatively correlated with food responsiveness ( $R = -0.23$ ,  $P = 0.04$ ;  
318 Figure 4d). Due to the role of SCFAs in appetite suppression, this result is expected (42). The  
319 production of SCFAs results in appetite suppression through increasing anorectic gut hormones  
320 like glucagon-like peptide 1 (GLP-1) (43). GLP-1 induces satiety and reduces weight gain by  
321 increasing insulin secretion following food intake (44). As such, our results seem to suggest that

322 higher abundances of Cluster I in formula-fed infants may decrease the food responsiveness of  
323 these infants through SCFA production.

324 One study suggests that breastfeeding protects against childhood obesity (45), which  
325 contradicts our suggested model. An explanation for this contradiction is that high abundances of  
326 SCFA-producers, such as Firmicutes, in the stool of formula-fed infants do not always indicate  
327 proper SCFA absorption by the infant. SCFA and metabolites may be excreted instead of  
328 absorbed, reducing satiety and increasing the risk of obesity (43). Furthermore, prior studies are  
329 discrepant with regard to whether breastfed or formula-fed infants show greater SCFA  
330 production and absorption, and report that SCFA distributions in infants vary by infant age (43).  
331 There is also no literature regarding how SCFA correlates with infant weight and whether  
332 breastfeeding protects against childhood obesity remains contested. Therefore, our proposed  
333 model, rather than being a dogma, should be treated as a call to further research regarding the  
334 relationship between the infant's diet, gut microbiome, and eating behaviours.

335

## 336 **CONCLUSION**

337 Our study investigated how the infant's diet impacts their gut microbiota and eating  
338 behaviours during the first 4 months of life. We initially hypothesized that formula-feeding  
339 would be associated with a higher abundance of the phylum Firmicutes and exhibition of  
340 obesity-prone eating behaviours. While we did find that formula-fed infants hosted greater levels  
341 of a cluster rich in Firmicutes, these microbes were associated with lower levels of food  
342 responsiveness, which would theoretically correspond to a lower obesity risk. Furthermore, we  
343 identified the production of SCFAs by the Firmicutes-rich cluster as a mechanism for decreasing  
344 food responsiveness. Our model postulates that formula impacts eating behaviours by altering

345 SCFA-producers in the gut microbiome. How these microbes change over time, prime the gut for  
346 future microbial colonization, and affect longer-term eating behaviors and growth trajectories  
347 remain to be seen. However, these results provide a new understanding of the  
348 psychophysiological impacts of gut microbial communities in the first 4 months of life, and calls  
349 for additional research to be done to better understand how infant diet impacts the development  
350 of adult microbial communities and subsequent growth and development of eating behaviors.  
351 Greater understanding of these factors can potentially inform strategies for childhood obesity  
352 prevention.

353

## 354 **ACKNOWLEDGMENTS**

355 We thank the MICB 447 instructors Dr. Dave Oliver, Dr. Stephan Koenig, Emily Adamczyk,  
356 and Mihai Cirstea at the University of British Columbia for their guidance. We would also like to  
357 acknowledge the UC San Diego Center for Microbiome Innovation for their collaboration in  
358 sequencing the samples. This work was supported by American Heart Association [grant number  
359 13EIA14660045] and the Eunice Kennedy Shriver National Institute of Child Health and Human  
360 Development [R01HD084163].

361

## 362 **REFERENCES**

- 363 1. Yang I, Corwin EJ, Brennan PA, Jordan S, Murphy JR, Dunlop A. 2016. The Infant  
364 Microbiome: Implications for Infant Health and Neurocognitive Development. *Nurs Res*  
365 65:76–88.
- 366 2. Kumbhare SV, Patangia DVV, Patil RH, Shouche YS, Patil NP. 2019. Factors influencing  
367 the gut microbiome in children: from infancy to childhood. *J Biosci* 44.

- 368 3. Wang M, Li M, Wu S, Lebrilla CB, Chapkin RS, Ivanov I, Donovan SM. 2015. Fecal  
369 microbiota composition of breast-fed infants is correlated with human milk  
370 oligosaccharides consumed. *J Pediatr Gastroenterol Nutr* 60:825–833.
- 371 4. Rinninella E, Raoul P, Cintoni M, Franceschi F, Miggiano GAD, Gasbarrini A, Mele MC.  
372 2019. What is the Healthy Gut Microbiota Composition? A Changing Ecosystem across  
373 Age, Environment, Diet, and Diseases. *Microorganisms* 7.
- 374 5. Ventura AK. 2017. Does Breastfeeding Shape Food Preferences Links to Obesity. *Ann Nutr*  
375 *Metab* 70:8–15.
- 376 6. Brown A, Lee M. 2012. Breastfeeding during the first year promotes satiety responsiveness  
377 in children aged 18-24 months. *Pediatr Obes* 7:382–390.
- 378 7. French SA, Epstein LH, Jeffery RW, Blundell JE, Wardle J. 2012. Eating Behavior  
379 Dimensions: Associations With Energy Intake And Body Weight: A Review. *Appetite*  
380 59:541–549.
- 381 8. Llewellyn CH, van Jaarsveld CHM, Johnson L, Carnell S, Wardle J. 2011. Development  
382 and factor structure of the Baby Eating Behaviour Questionnaire in the Gemini birth cohort.  
383 *Appetite* 57:388–396.
- 384 9. Sanmiguel C, Gupta A, Mayer EA. 2015. Gut Microbiome and Obesity: A Plausible  
385 Explanation for Obesity. *Curr Obes Rep* 4:250–261.
- 386 10. Yadav H, Lee J-H, Lloyd J, Walter P, Rane SG. 2013. Beneficial metabolic effects of a  
387 probiotic via butyrate-induced GLP-1 hormone secretion. *J Biol Chem* 288:25088–25097.

- 388 11. Ilmonen J, Isolauri E, Poussa T, Laitinen K. 2011. Impact of dietary counselling and  
389 probiotic intervention on maternal anthropometric measurements during and after  
390 pregnancy: a randomized placebo-controlled trial. *Clin Nutr Edinb Scotl* 30:156–164.
- 391 12. Kadooka Y, Sato M, Imaizumi K, Ogawa A, Ikuyama K, Akai Y, Okano M, Kagoshima M,  
392 Tsuchida T. 2010. Regulation of abdominal adiposity by probiotics (*Lactobacillus gasseri*  
393 SBT2055) in adults with obese tendencies in a randomized controlled trial. *Eur J Clin Nutr*  
394 64:636–643.
- 395 13. Alcock J, Maley CC, Aktipis CA. 2014. Is eating behavior manipulated by the  
396 gastrointestinal microbiota? Evolutionary pressures and potential mechanisms. *BioEssays*  
397 36:940–949.
- 398 14. Raybould HE. 2010. Gut chemosensing: interactions between gut endocrine cells and  
399 visceral afferents. *Auton Neurosci Basic Clin* 153:41–46.
- 400 15. Sarr MG, Billington CJ, Brancatisano R, Brancatisano A, Toouli J, Kow L, Nguyen NT,  
401 Blackstone R, Maher JW, Shikora S, Reeds DN, Eagon JC, Wolfe BM, O'Rourke RW,  
402 Fujioka K, Takata M, Swain JM, Morton JM, Ikramuddin S, Schweitzer M, Chand B,  
403 Rosenthal R, EMPOWER Study Group. 2012. The EMPOWER study: randomized,  
404 prospective, double-blind, multicenter trial of vagal blockade to induce weight loss in  
405 morbid obesity. *Obes Surg* 22:1771–1782.
- 406 16. Oksanen J, Blanchet FG, Friendly M, Kindt R, Legendre P, McGlenn D, Minchin PR,  
407 O'Hara RB, Simpson GL, Solymos P, Stevens MHH, Szoecs E, Wagner H. 2020. *vegan*:  
408 *Community Ecology Package*.

- 409 17. Bolyen E, Rideout JR, Dillon MR, Bokulich NA, Abnet CC, Al-Ghalith GA, Alexander H,  
410 Alm EJ, Arumugam M, Asnicar F, Bai Y, Bisanz JE, Bittinger K, Brejnrod A, Brislawn CJ,  
411 Brown CT, Callahan BJ, Caraballo-Rodríguez AM, Chase J, Cope EK, Da Silva R, Diener  
412 C, Dorrestein PC, Douglas GM, Durall DM, Duvallet C, Edwardson CF, Ernst M, Estaki  
413 M, Fouquier J, Gauglitz JM, Gibbons SM, Gibson DL, Gonzalez A, Gorlick K, Guo J,  
414 Hillmann B, Holmes S, Holste H, Huttenhower C, Huttley GA, Janssen S, Jarmusch AK,  
415 Jiang L, Kaehler BD, Kang KB, Keefe CR, Keim P, Kelley ST, Knights D, Koester I,  
416 Kosciulek T, Kreps J, Langille MGI, Lee J, Ley R, Liu Y-X, Lofffield E, Lozupone C,  
417 Maher M, Marotz C, Martin BD, McDonald D, McIver LJ, Melnik AV, Metcalf JL,  
418 Morgan SC, Morton JT, Naimey AT, Navas-Molina JA, Nothias LF, Orchanian SB,  
419 Pearson T, Peoples SL, Petras D, Preuss ML, Pruesse E, Rasmussen LB, Rivers A, Robeson  
420 MS, Rosenthal P, Segata N, Shaffer M, Shiffer A, Sinha R, Song SJ, Spear JR, Swafford  
421 AD, Thompson LR, Torres PJ, Trinh P, Tripathi A, Turnbaugh PJ, Ul-Hasan S, van der  
422 Hooft JJJ, Vargas F, Vázquez-Baeza Y, Vogtmann E, von Hippel M, Walters W, Wan Y,  
423 Wang M, Warren J, Weber KC, Williamson CHD, Willis AD, Xu ZZ, Zaneveld JR, Zhang  
424 Y, Zhu Q, Knight R, Caporaso JG. 2019. Reproducible, interactive, scalable and extensible  
425 microbiome data science using QIIME 2. 8. *Nat Biotechnol* 37:852–857.
- 426 18. Callahan BJ, McMurdie PJ, Rosen MJ, Han AW, Johnson AJA, Holmes SP. 2016.  
427 DADA2: High resolution sample inference from Illumina amplicon data. *Nat Methods*  
428 13:581–583.
- 429 19. DeSantis TZ, Hugenholtz P, Larsen N, Rojas M, Brodie EL, Keller K, Huber T, Dalevi D,  
430 Hu P, Andersen GL. 2006. Greengenes, a Chimera-Checked 16S rRNA Gene Database and  
431 Workbench Compatible with ARB. *Appl Environ Microbiol* 72:5069–5072.



- 432 20. Paradis E, Schliep K. 2019. ape 5.0: an environment for modern phylogenetics and  
433 evolutionary analyses in R. *Bioinformatics* 35:526–528.
- 434 21. McMurdie PJ, Holmes S. 2013. phyloseq: An R Package for Reproducible Interactive  
435 Analysis and Graphics of Microbiome Census Data. *PLOS ONE* 8:e61217.
- 436 22. Kuhn M. 2008. Building Predictive Models in R Using the caret Package. 1. *J Stat Softw*  
437 28:1–26.
- 438 23. Liaw A, Wiener M. 2001. Classification and Regression by RandomForest. *Forest* 23.
- 439 24. Cirstea MS, Yu AC, Golz E, Sundvick K, Kliger D, Radisavljevic N, Foulger LH,  
440 Mackenzie M, Huan T, Finlay BB, Appel-Cresswell S. 2020. Microbiota Composition and  
441 Metabolism Are Associated With Gut Function in Parkinson’s Disease. *Mov Disord*  
442 35:1208–1217.
- 443 25. Douglas GM, Maffei VJ, Zaneveld JR, Yurgel SN, Brown JR, Taylor CM, Huttenhower C,  
444 Langille MGI. 2020. PICRUSt2 for prediction of metagenome functions. 6. *Nat Biotechnol*  
445 38:685–688.
- 446 26. Fernandes AD, Macklaim JM, Linn TG, Reid G, Gloor GB. 2013. ANOVA-Like  
447 Differential Expression (ALDEx) Analysis for Mixed Population RNA-Seq. *PLOS ONE*  
448 8:e67019.
- 449 27. Ho NT, Li F, Lee-Sarwar KA, Tun HM, Brown BP, Pannaraj PS, Bender JM, Azad MB,  
450 Thompson AL, Weiss ST, Azcarate-Peril MA, Litonjua AA, Kozyrskyj AL, Jaspan HB,

- 451 Aldrovandi GM, Kuhn L. 2018. Meta-analysis of effects of exclusive breastfeeding on  
452 infant gut microbiota across populations. *Nat Commun* 9.
- 453 28. Vázquez-Baeza Y, Hyde ER, Suchodolski JS, Knight R. 2016. Dog and human  
454 inflammatory bowel disease rely on overlapping yet distinct dysbiosis networks. *Nat*  
455 *Microbiol* 1:1–5.
- 456 29. Lee SA, Lim JY, Kim B-S, Cho SJ, Kim NY, Kim OB, Kim Y. 2015. Comparison of the  
457 gut microbiota profile in breast-fed and formula-fed Korean infants using pyrosequencing.  
458 *Nutr Res Pract* 9:242–248.
- 459 30. Coyte KZ, Rakoff-Nahoum S. 2019. Understanding Competition and Cooperation within  
460 the Mammalian Gut Microbiome. *Curr Biol CB* 29:R538–R544.
- 461 31. Davis EC, Wang M, Donovan SM. 2017. The role of early life nutrition in the  
462 establishment of gastrointestinal microbial composition and function. *Gut Microbes* 8:143–  
463 171.
- 464 32. Ozato N, Saito S, Yamaguchi T, Katashima M, Tokuda I, Sawada K, Katsuragi Y, Kakuta  
465 M, Imoto S, Ihara K, Nakaji S. 2019. *Blautia* genus associated with visceral fat  
466 accumulation in adults 20–76 years of age. *Npj Biofilms Microbiomes* 5:1–9.
- 467 33. Chen Y, Zheng H, Zhang G, Chen F, Chen L, Yang Z. 2020. High *Oscillospira* abundance  
468 indicates constipation and low BMI in the Guangdong Gut Microbiome Project. *1. Sci Rep*  
469 10:9364.

- 470 34. Mukherjee A, Lordan C, Ross RP, Cotter PD. 2020. Gut microbes from the  
471 phylogenetically diverse genus *Eubacterium* and their various contributions to gut health.  
472 *Gut Microbes* 12:1802866.
- 473 35. Fan W, Huo G, Li X, Yang L, Duan C, Wang T, Chen J. 2013. Diversity of the intestinal  
474 microbiota in different patterns of feeding infants by Illumina high-throughput sequencing.  
475 *World J Microbiol Biotechnol* 29:2365–2372.
- 476 36. Fukuda S, Toh H, Hase K, Oshima K, Nakanishi Y, Yoshimura K, Tobe T, Clarke JM,  
477 Topping DL, Suzuki T, Taylor TD, Itoh K, Kikuchi J, Morita H, Hattori M, Ohno H. 2011.  
478 *Bifidobacteria can protect from enteropathogenic infection through production of acetate.*  
479 *Nature* 469:543–547.
- 480 37. van den Bogert B, Meijerink M, Zoetendal EG, Wells JM, Kleerebezem M. 2014.  
481 *Immunomodulatory Properties of Streptococcus and Veillonella Isolates from the Human*  
482 *Small Intestine Microbiota.* *PLoS ONE* 9.
- 483 38. Zamakhchari M, Wei G, Dewhirst F, Lee J, Schuppan D, Oppenheim FG, Helmerhorst EJ.  
484 2011. Identification of *Rothia* Bacteria as Gluten-Degrading Natural Colonizers of the  
485 Upper Gastro-Intestinal Tract. *PLoS ONE* 6.
- 486 39. Zimmermann P, Curtis N. 2020. Breast milk microbiota: A review of the factors that  
487 influence composition. *J Infect* 81:17–47.
- 488 40. Fernandes J, Su W, Rahat-Rozenbloom S, Wolever TMS, Comelli EM. 2014. Adiposity,  
489 gut microbiota and faecal short chain fatty acids are linked in adult humans. *6. Nutr*  
490 *Diabetes* 4:e121–e121.

- 491 41. Parada Venegas D, De la Fuente MK, Landskron G, González MJ, Quera R, Dijkstra G,  
492 Harmsen HJM, Faber KN, Hermoso MA. 2019. Short Chain Fatty Acids (SCFAs)-  
493 Mediated Gut Epithelial and Immune Regulation and Its Relevance for Inflammatory  
494 Bowel Diseases. *Front Immunol* 10.
- 495 42. Byrne CS, Chambers ES, Morrison DJ, Frost G. 2015. The role of short chain fatty acids in  
496 appetite regulation and energy homeostasis. *Int J Obes* 2005 39:1331–1338.
- 497 43. Differding MK, Benjamin-Neelon SE, Hoyo C, Østbye T, Mueller NT. 2020. Timing of  
498 complementary feeding is associated with gut microbiota diversity and composition and  
499 short chain fatty acid concentrations over the first year of life. *BMC Microbiol* 20:56.
- 500 44. MacDonald PE, El-kholy W, Riedel MJ, Salapatek AMF, Light PE, Wheeler MB. 2002.  
501 The Multiple Actions of GLP-1 on the Process of Glucose-Stimulated Insulin Secretion.  
502 *Diabetes* 51:S434–S442.
- 503 45. Yan J, Liu L, Zhu Y, Huang G, Wang PP. 2014. The association between breastfeeding and  
504 childhood obesity: a meta-analysis. *BMC Public Health* 14.

505
